# Supplementary material for: A strong and flexible electronic vessel for real-time monitoring of temperature, motions and flow
Source: Royal Society of Chemistry journal article supplement (doi:10.1039/c7nr05575g), 2017-01-01
Supplement: c7nr05575g1.pdf [file c7nr05575g1.pdf]

Supporting Information

A strong and flexible electronic tube for real-time monitoring temperature, motions and flow

Wei Zhang<sup>a</sup>, Chengyi Hou<sup>a,\*</sup>, Yaogang Li<sup>b</sup>, Qinghong Zhang<sup>b</sup>, Hongzhi Wang<sup>a,\*</sup>

\* Corresponding author. E-mail address: [hcy@dhu.edu.cn](mailto:hcy@dhu.edu.cn) (C.H.), [wanghz@dhu.edu.cn](mailto:wanghz@dhu.edu.cn)

<sup>a</sup> State Key Laboratory for Modification of Chemical Fibers and Polymer Materials, College of Materials Science and Engineering, Donghua University, Shanghai

<sup>b</sup> Engineering Research Center of Advanced Glasses Manufacturing Technology, College of Materials Science and Engineering, Donghua University, Shanghai

## 1. Supporting Images

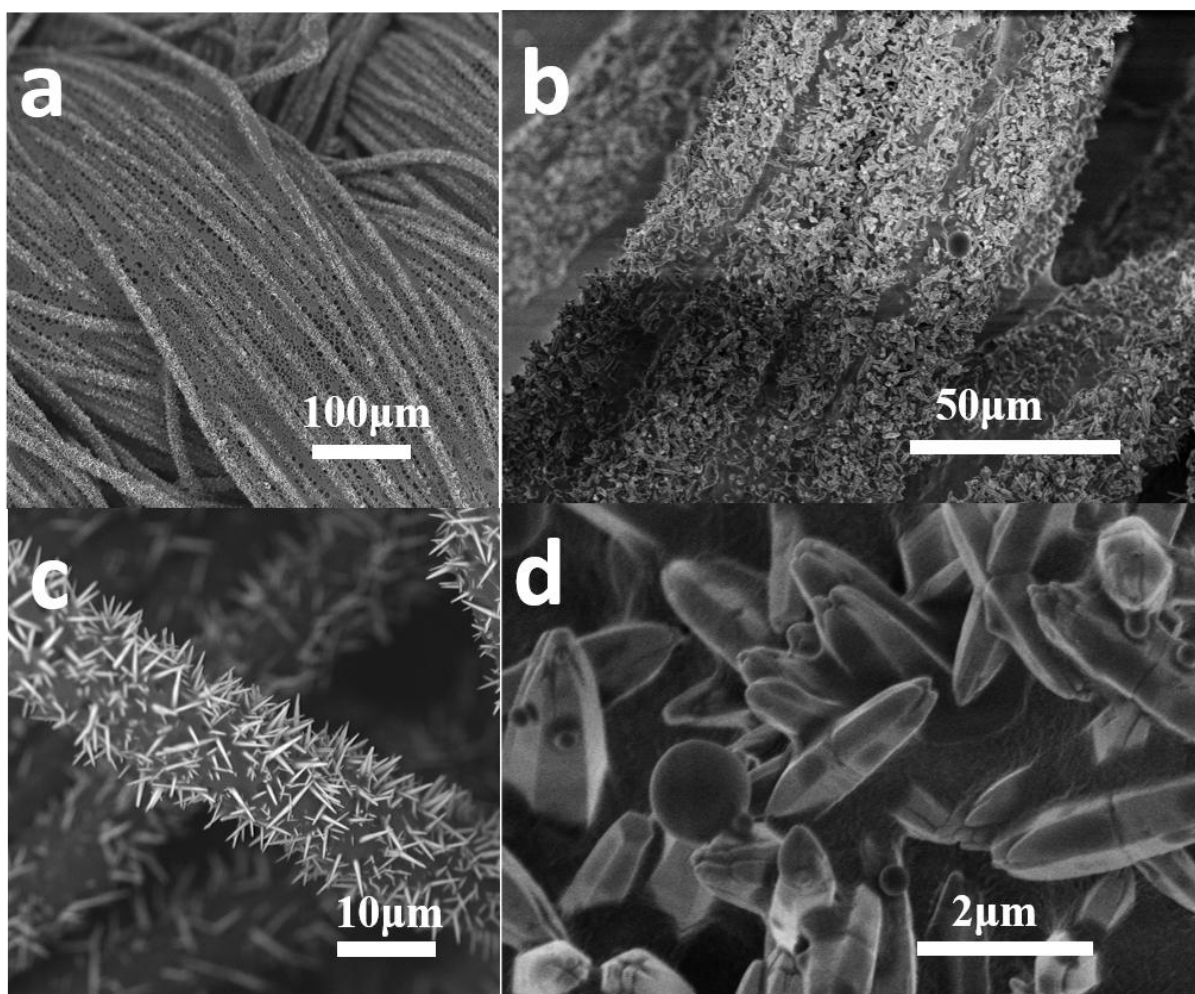

**Fig. S1** SEM images of the cotton@SWNTs/ZnO@PVDF.

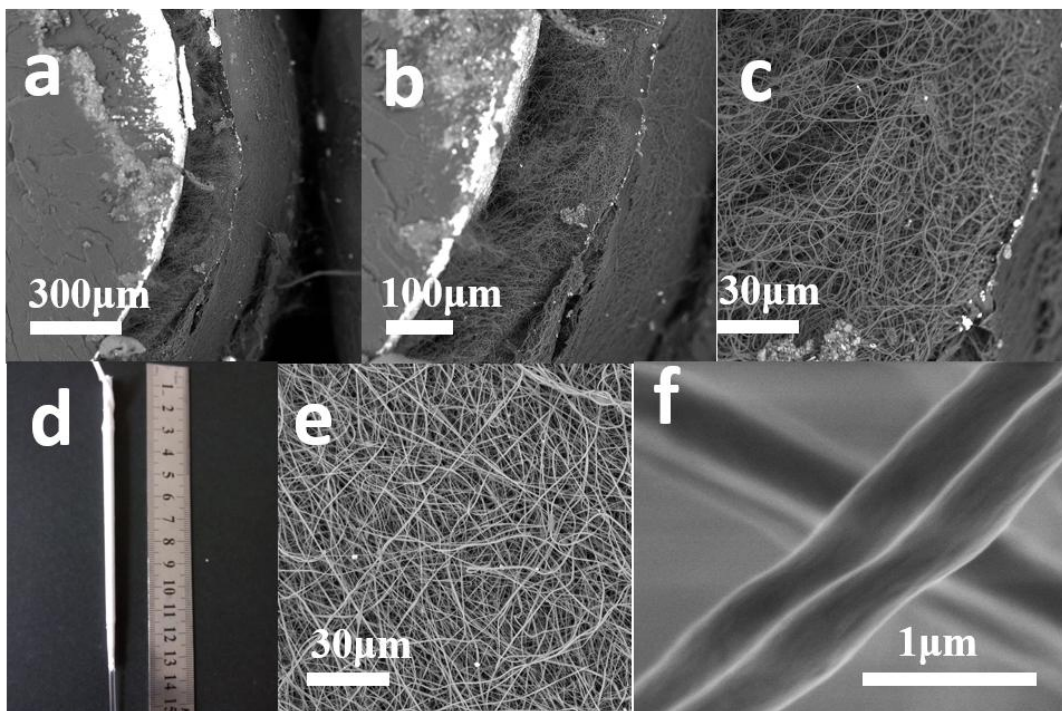

**Fig. S2** (a) SEM image of cross-section view of tubular PVDF fibrous membrane. (b) and (c) are corresponding magnified picture. (d) photograph of tubular PVDF fibrous membrane. (e) SEM image of top view of PVDF fibrous membrane. (f) is corresponding magnified picture.

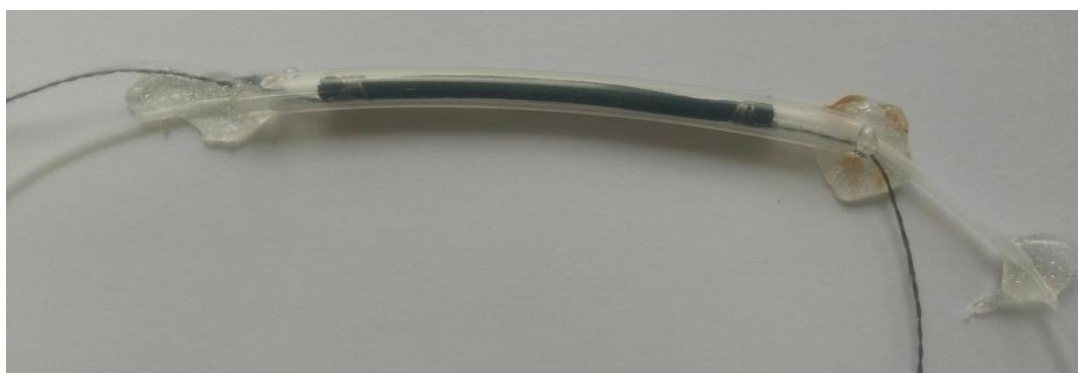

**Fig. S3** A photograph of silicone rubber microreactor.

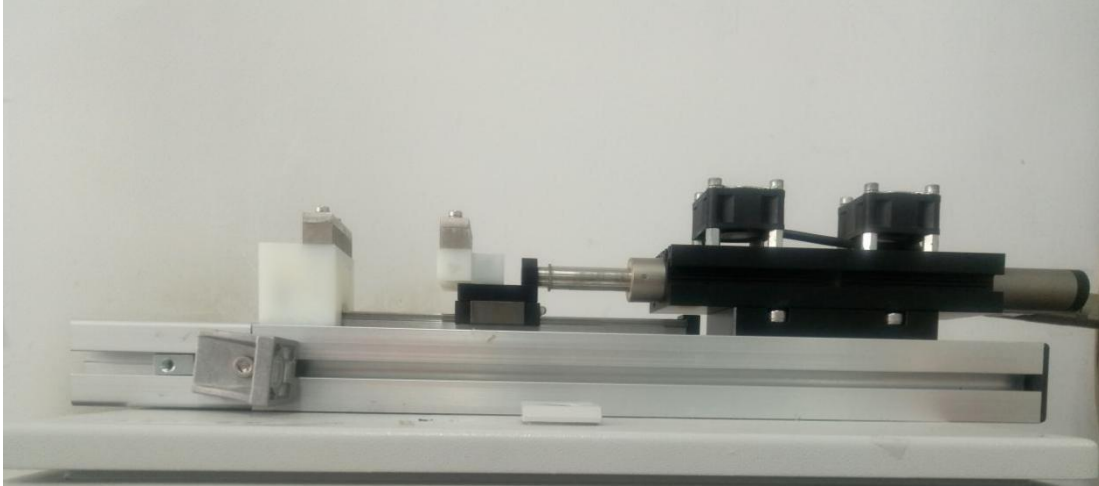

**Fig. S4** A photograph of mechanical motor-driven machine.

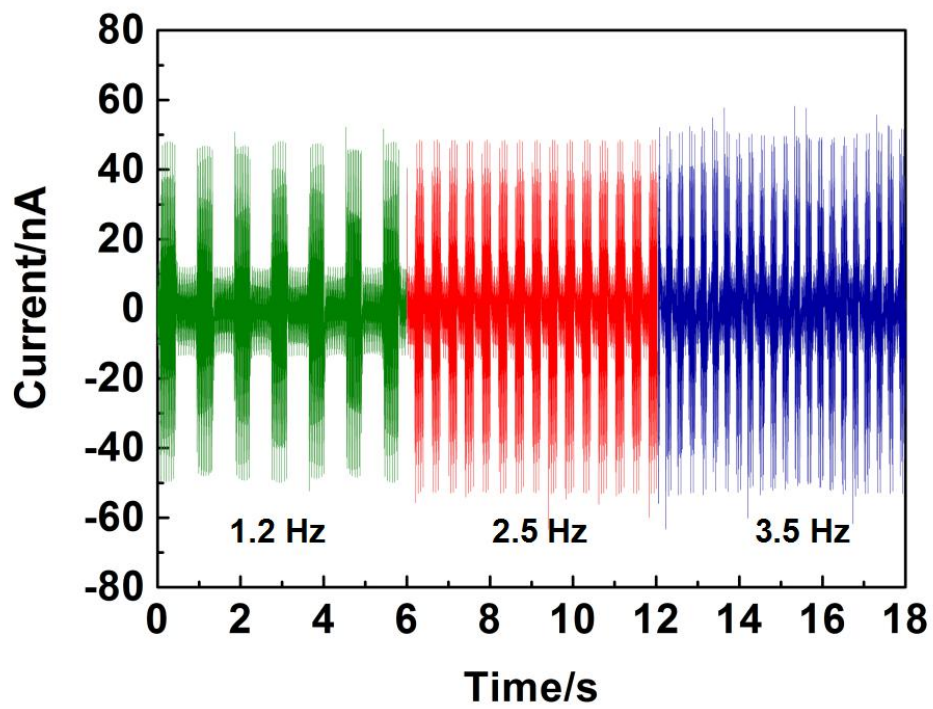

**Fig. S5** The output current of flexible sensor under bending condition with different frequencies.

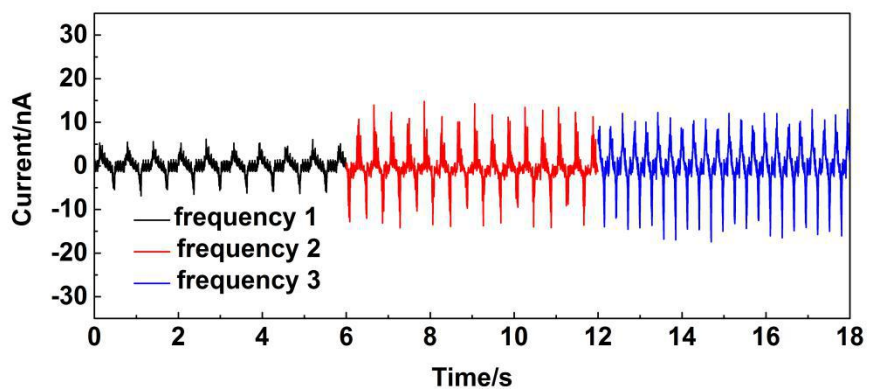

**Fig. S6** The output current generated by the sensor under compressing with different frequencies.

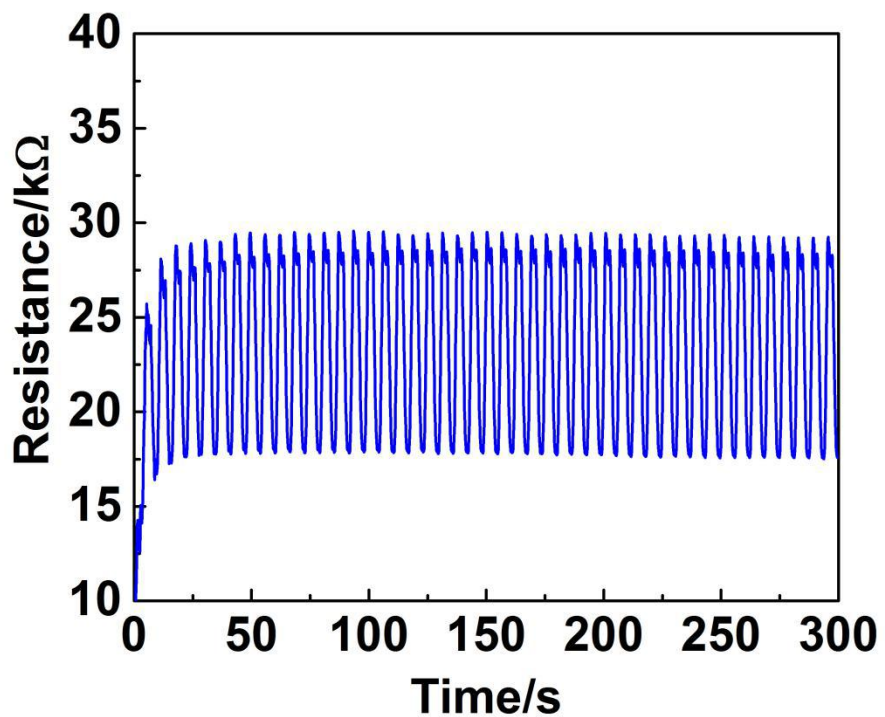

**Fig. S7** The stability test of the cotton@SWNTs/ZnO@PVDF.

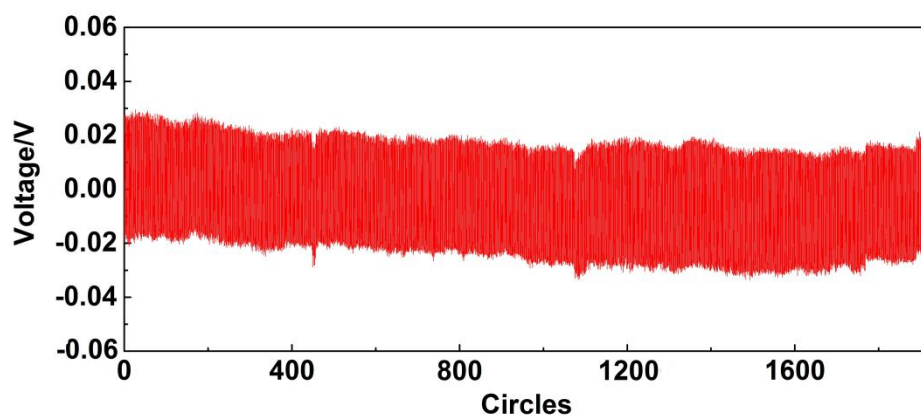

Fig. S8 The output signal of the sensor during 1920 circles' compressing circle test.

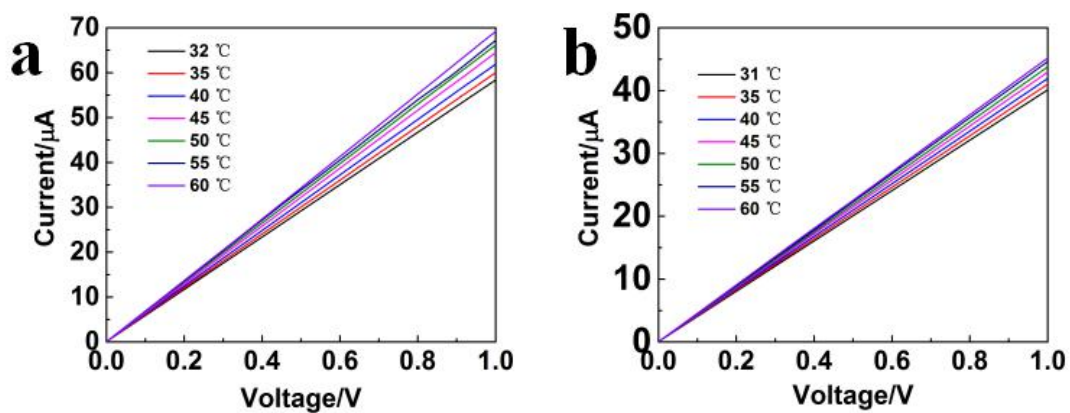

Fig. S9 (a) The I-V curves of the sensor measured under different temperature before 1920 circles' bending. (b) The I-V curves of the sensor measured under different temperature after 1920 circles' bending.



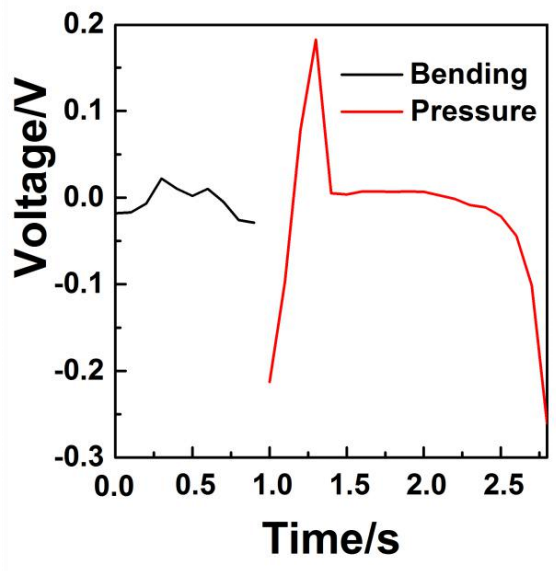

Fig. S10 The output voltage of the sensor under bending and pressure.

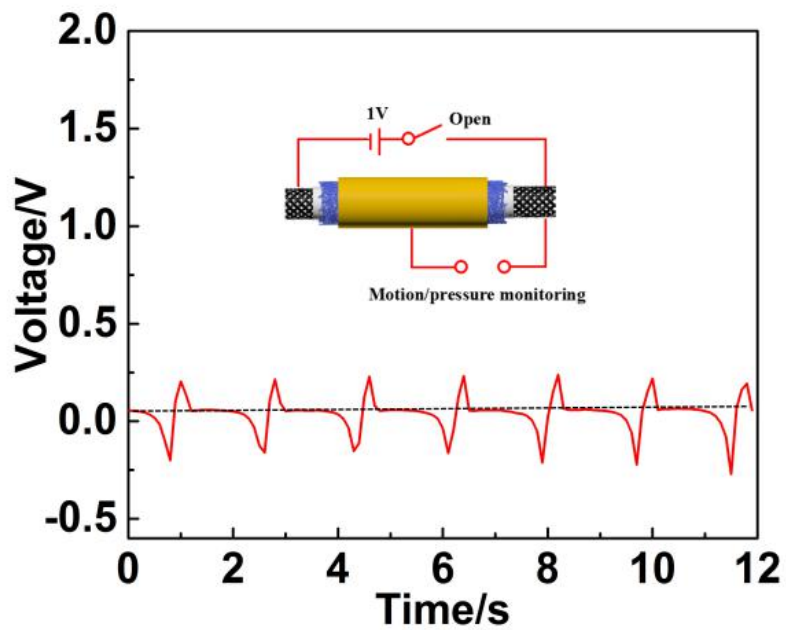

Fig. S11 The output voltage under pressure without voltage applied on the shared electrode.

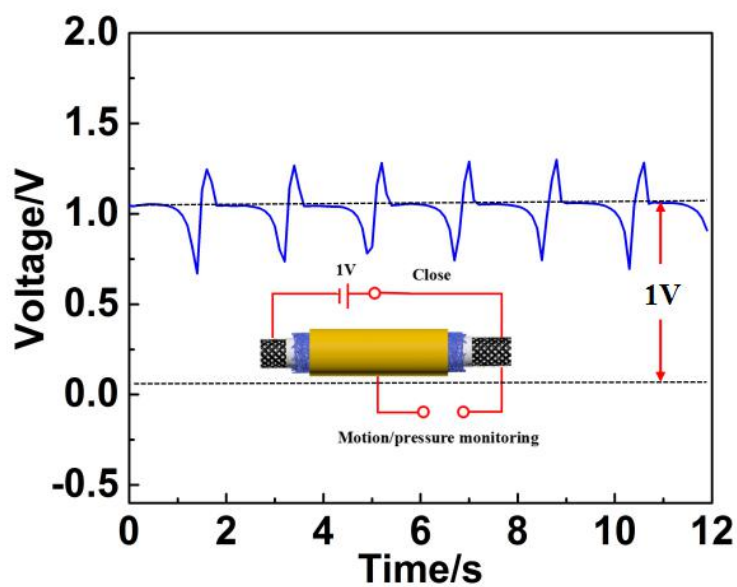

**Fig. S12** The output voltage under pressure with 1V applied on the shared electrode.

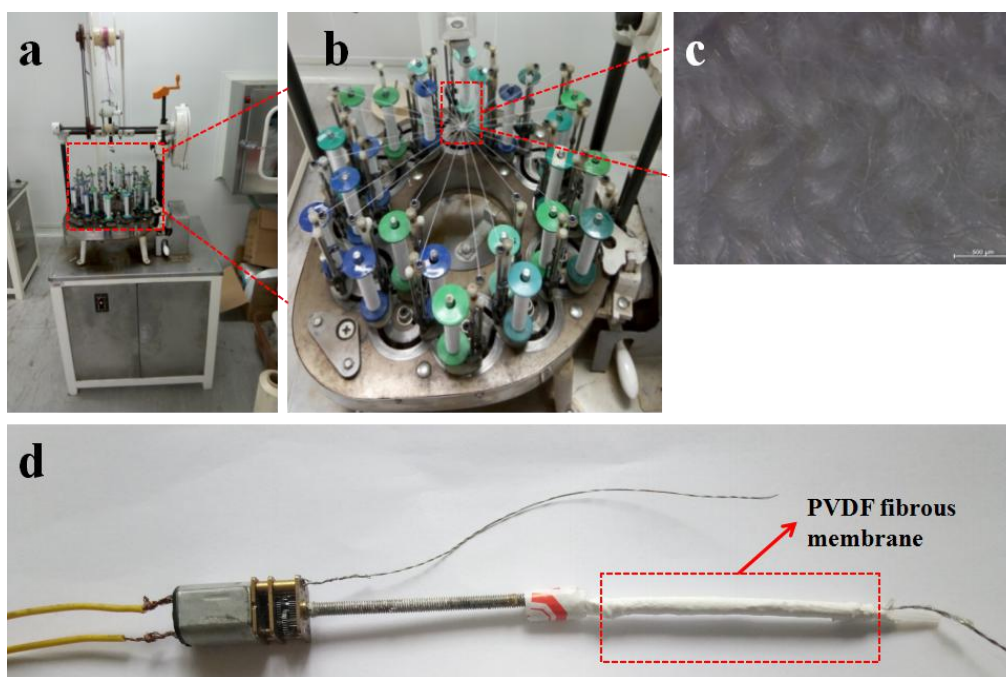

**Fig. S13** (a) A photograph of high-speed braiding machine. (b) Partial enlarged detail of (a). (c) A photograph of the braided cotton hose. (d) A photograph of motor used for electrospinning.



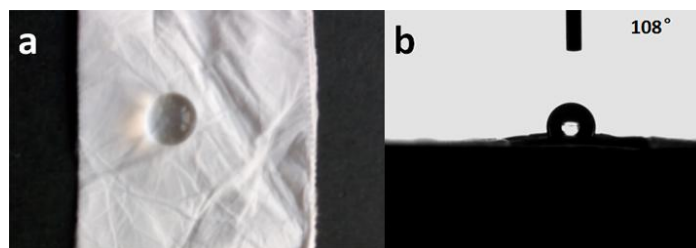

**Fig. S14** (a) A photograph of PVDF fibrous membrane. (b) Contact angle of water against of PVDF fibrous membrane after treated with ethyl acetate.

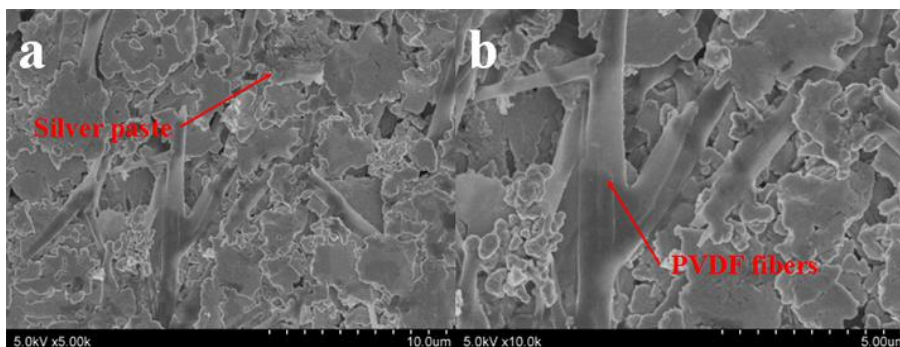

**Fig. S15** (a) FE-SEM images of PVDF fibers coated by silver paste. (b) corresponding high magnification images.

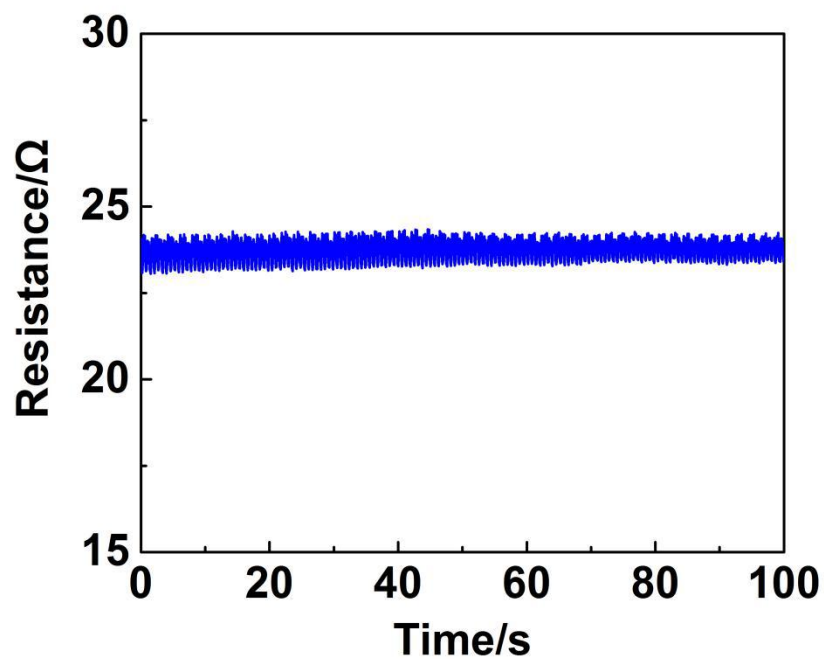

**Fig. S16** The stability test of outer electrode.

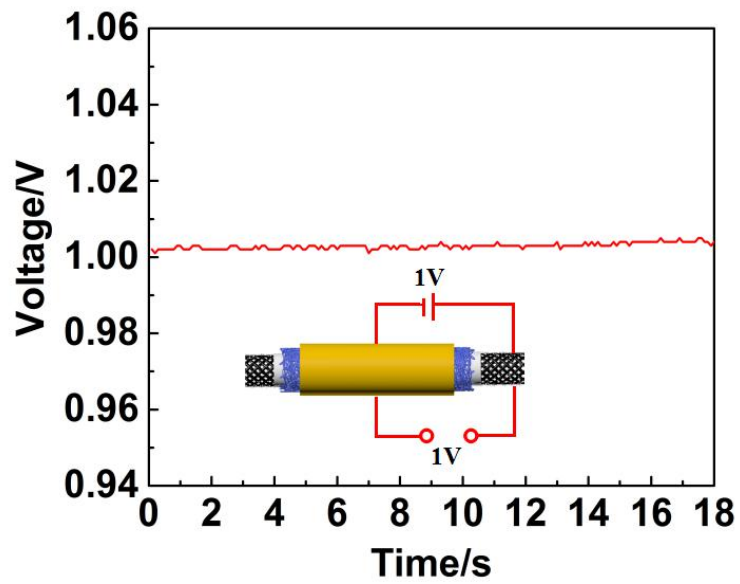

**Fig. S17** the open circuit voltage variation during continuous bending process.

## 2. Supporting Video

**Video S1** The temperature sensing of the sensor under bending state during heating process.

**Video S2** The temperature sensing of the sensor under bending state during cooling process.
